# Supplementary material for: Phenolic Contents and Compositions in Skins of Red Wine Grape Cultivars among Various Genetic Backgrounds and Originations
Source: Int J Mol Sci. 2012 Mar 14;13(3):3492–510. doi: 10.3390/ijms13033492 (PMC3317724; doi:10.3390/ijms13033492)
Supplement: Supplementary file 1 [file ijms-13-03492-s001.pdf]

# Supplementary Information

**Appendix 1.** Contents of anthocyanin compounds in the skins of different grape cultivars

| Cultivars <sup>c</sup>                                 |              |              |               |               |               |               |               |              |              |              |               |               |               |
|--------------------------------------------------------|--------------|--------------|---------------|---------------|---------------|---------------|---------------|--------------|--------------|--------------|---------------|---------------|---------------|
| Compounds <sup>a,b</sup><br>( $\mu\text{g MGE/g DW}$ ) | CS           | ML           | CB            | SH            | SY            | ZS-1          | ZS-2          | BP           | MA           | MI           | SN            | HS            | ZH            |
| Dp-3,5-diglc                                           | nd           | nd           | 656.55 $\pm$  | 1290.08 $\pm$ | 440.79 $\pm$  | 1552.50 $\pm$ | 1704.53 $\pm$ | nd           | nd           | 44.87 $\pm$  | 2378.51 $\pm$ | 106.45 $\pm$  | 742.17 $\pm$  |
|                                                        |              |              | 6.64          | 17.29         | 12.95         | 180.73        | 8.41          |              |              | 3.60         | 19.10         | 9.36          | 7.50          |
| Cy-3,5-diglc                                           | nd           | nd           | 373.07 $\pm$  | 224.25 $\pm$  | 1008.01 $\pm$ | 601.53 $\pm$  | 1143.16 $\pm$ | nd           | nd           | nd           | 392.48 $\pm$  | 14.46 $\pm$   | 322.82 $\pm$  |
|                                                        |              |              | 5.02          | 5.41          | 15.97         | 15.45         | 16.80         |              |              |              | 10.14         | 1.56          | 8.21          |
| Pt-3,5-diglc                                           | nd           | nd           | 630.15 $\pm$  | 1036.74 $\pm$ | 600.44 $\pm$  | 1257.30 $\pm$ | 1340.57 $\pm$ | 43.14 $\pm$  | 33.51 $\pm$  | 51.34 $\pm$  | 2734.42 $\pm$ | 33.73 $\pm$   | 437.13 $\pm$  |
|                                                        |              |              | 6.41          | 15.43         | 17.39         | 23.38         | 7.03          | 5.63         | 4.33         | 6.70         | 20.04         | 3.89          | 8.35          |
| Dp-3-glc                                               | 123.60 $\pm$ | 123.18 $\pm$ | 367.04 $\pm$  | 277.11 $\pm$  | 241.39 $\pm$  | 878.16 $\pm$  | 2634.50 $\pm$ | nd           | 53.06 $\pm$  | 25.95 $\pm$  | 979.97 $\pm$  | 2719.36 $\pm$ | 5679.48 $\pm$ |
|                                                        | 45.26        | 16.16        | 13.10         | 12.49         | 9.35          | 17.31         | 9.96          |              | 5.43         | 2.54         | 17.11         | 18.08         | 8.11          |
| Pg-3,5-diglc                                           | nd           | nd           | nd            | nd            | nd            | nd            | nd            | nd           | nd           | nd           | nd            | nd            | nd            |
| Pn-3,5-diglc                                           | nd           | nd           | 335.97 $\pm$  | 478.22 $\pm$  | 508.73 $\pm$  | 766.37 $\pm$  | 897.11 $\pm$  | 84.20 $\pm$  | 37.87 $\pm$  | 74.78 $\pm$  | 562.62 $\pm$  | 41.84 $\pm$   | 291.08 $\pm$  |
|                                                        |              |              | 9.19          | 15.97         | 12.51         | 15.17         | 6.45          | 5.07         | 3.70         | 3.44         | 13.72         | 5.76          | 4.02          |
| Mv-3,5-diglc                                           | nd           | nd           | 2150.57 $\pm$ | 3105.77 $\pm$ | 1554.45 $\pm$ | 4034.56 $\pm$ | 4663.20 $\pm$ | 794.17 $\pm$ | 133.01 $\pm$ | 758.51 $\pm$ | 4148.34 $\pm$ | 53.16 $\pm$   | 2547.98 $\pm$ |
|                                                        |              |              | 17.06         | 20.08         | 40.22         | 37.96         | 9.27          | 14.20        | 7.93         | 9.26         | 22.49         | 6.83          | 6.55          |
| Cy-3-glc                                               | 47.21 $\pm$  | 48.37 $\pm$  | nd            | nd            | nd            | nd            | nd            | nd           | nd           | nd           | nd            | 593.03 $\pm$  | nd            |
|                                                        | 3.81         | 6.86         |               |               |               |               |               |              |              |              |               | 10.69         |               |
| Pt-3-glc                                               | 127.97 $\pm$ | 116.90 $\pm$ | 78.45 $\pm$   | 108.71 $\pm$  | 44.52 $\pm$   | 522.61 $\pm$  | 748.27 $\pm$  | nd           | 57.44 $\pm$  | nd           | 194.02 $\pm$  | 1548.03 $\pm$ | 2153.69 $\pm$ |
|                                                        | 28.72        | 7.36         | 7.45          | 8.74          | 3.68          | 4.77          | 5.16          |              | 2.87         |              | 7.70          | 19.75         | 8.30          |
| Pg-3-glc                                               | nd           | nd           | nd            | nd            | nd            | nd            | nd            | nd           | nd           | nd           | nd            | nd            | nd            |
| Cy-3-acglc-5-glc                                       | nd           | nd           | nd            | nd            | nd            | nd            | nd            | nd           | tr           | nd           | nd            | nd            | nd            |
| Pt-3-acglc-5-glc                                       | nd           | nd           | nd            | nd            | nd            | nd            | nd            | nd           | nd           | nd           | nd            | nd            | nd            |
| Pn-3-glc                                               | 263.83 $\pm$ | 218.63 $\pm$ | 13.12 $\pm$   | 10.33 $\pm$   | 53.36 $\pm$   | 43.43 $\pm$   | 272.50 $\pm$  | nd           | 25.33 $\pm$  | 19.13 $\pm$  | 26.09 $\pm$   | 69.58 $\pm$   | 268.92 $\pm$  |
|                                                        | 22.08        | 27.18        | 2.03          | 0.90          | 7.10          | 5.42          | 6.94          |              | 1.52         | 3.39         | 7.90          | 4.72          | 6.60          |

## Appendix 1. Cont.

| Compounds <sup>a,b</sup><br>( $\mu\text{g MGE/g DW}$ ) | Cultivars <sup>c</sup> |                      |                  |                  |                  |                    |                    |                  |                   |                  |                   |                    |                    |
|--------------------------------------------------------|------------------------|----------------------|------------------|------------------|------------------|--------------------|--------------------|------------------|-------------------|------------------|-------------------|--------------------|--------------------|
|                                                        | CS                     | ML                   | CB               | SH               | SY               | ZS-1               | ZS-2               | BP               | MA                | MI               | SN                | HS                 | ZH                 |
| Mv-3-glc                                               | 2153.27 $\pm$ 35.26    | 1436.27 $\pm$ 204.25 | 51.77 $\pm$ 5.36 | 63.92 $\pm$ 7.32 | 27.49 $\pm$ 6.11 | 380.50 $\pm$ 23.47 | 967.11 $\pm$ 14.98 | 27.38 $\pm$ 5.31 | 149.43 $\pm$ 8.28 | 32.78 $\pm$ 4.78 | 124.03 $\pm$ 6.25 | 411.91 $\pm$ 7.56  | 1458.67 $\pm$ 5.26 |
| Dp-3-cfglc-5-glc                                       | nd                     | nd                   | nd               | nd               | nd               | nd                 | nd                 | nd               | nd                | nd               | nd                | nd                 | nd                 |
| Dp-3-cis-cmglc-5-glc                                   | nd                     | nd                   | nd               | nd               | nd               | nd                 | nd                 | nd               | nd                | nd               | nd                | nd                 | nd                 |
| Pn-3-acglc-5-glc                                       | nd                     | nd                   | nd               | nd               | nd               | nd                 | nd                 | nd               | nd                | nd               | nd                | nd                 | nd                 |
| Dp-3-acglc                                             | nd                     | nd                   | nd               | nd               | nd               | nd                 | nd                 | nd               | nd                | nd               | nd                | nd                 | nd                 |
| Mv-3-acglc-5-glc                                       | nd                     | nd                   | nd               | nd               | nd               | nd                 | nd                 | 7.42 $\pm$ 0.38  | tr                | 24.29 $\pm$ 2.97 | 7.44 $\pm$ 0.35   | nd                 | nd                 |
| Dp-3-trans-cmglc-5-glc                                 | nd                     | nd                   | nd               | nd               | nd               | nd                 | nd                 | 16.54 $\pm$ 1.86 | 11.07 $\pm$ 0.94  | nd               | 11.84 $\pm$ 1.39  | 226.08 $\pm$ 12.51 | nd                 |
| Cy-3-acglc                                             | nd                     | nd                   | nd               | nd               | nd               | nd                 | nd                 | nd               | nd                | nd               | nd                | nd                 | nd                 |
| Dp-3-cfglc                                             | nd                     | nd                   | nd               | nd               | nd               | nd                 | nd                 | nd               | 6.07 $\pm$ 0.37   | nd               | nd                | 65.57 $\pm$ 9.02   | nd                 |
| Pt-3-cis-cmglc-5-glc                                   | nd                     | nd                   | nd               | nd               | nd               | nd                 | nd                 | nd               | 7.30 $\pm$ 0.52   | nd               | nd                | 14.90 $\pm$ 1.95   | nd                 |
| Pt-3-acglc                                             | nd                     | nd                   | nd               | nd               | nd               | nd                 | nd                 | nd               | tr                | nd               | nd                | 65.58 $\pm$ 8.04   | nd                 |
| Dp-3-cis-cmglc                                         | nd                     | nd                   | nd               | nd               | nd               | nd                 | nd                 | nd               | 9.86 $\pm$ 0.95   | nd               | nd                | nd                 | nd                 |
| Cy-3-cmglc-5-glc                                       | nd                     | nd                   | nd               | nd               | nd               | nd                 | nd                 | nd               | nd                | nd               | nd                | 61.05 $\pm$ 5.50   | nd                 |
| Pt-3-trans-cmglc-5-glc                                 | nd                     | nd                   | nd               | nd               | nd               | nd                 | nd                 | 40.05 $\pm$ 6.56 | 22.48 $\pm$ 2.48  | nd               | nd                | 177.25 $\pm$ 10.92 | nd                 |
| Mv-3-cfglc-5-glc                                       | nd                     | nd                   | nd               | nd               | nd               | nd                 | nd                 | nd               | 16.37 $\pm$ 1.16  | 79.97 $\pm$ 8.38 | nd                | nd                 | nd                 |

## Appendix 1. Cont.

| Cultivars <sup>c</sup>                                 |                       |                      |    |    |    |      |      |                       |                      |                      |                     |                        |    |
|--------------------------------------------------------|-----------------------|----------------------|----|----|----|------|------|-----------------------|----------------------|----------------------|---------------------|------------------------|----|
| Compounds <sup>a,b</sup><br>( $\mu\text{g MGE/g DW}$ ) | CS                    | ML                   | CB | SH | SY | ZS-1 | ZS-2 | BP                    | MA                   | MI                   | SN                  | HS                     | ZH |
| Pt-3-cfglc                                             | nd                    | nd                   | nd | nd | nd | nd   | nd   | nd                    | 11.20 $\pm$<br>0.82  | nd                   | nd                  | nd                     | nd |
| Pn-3-cis-cmglc-5-glc                                   | nd                    | nd                   | nd | nd | nd | nd   | nd   | nd                    | tr                   | nd                   | nd                  | nd                     | nd |
| Mv-3-cis-cmglc-5-glc                                   | nd                    | nd                   | nd | nd | nd | nd   | nd   | 19.68 $\pm$<br>2.78   | 24.03 $\pm$<br>2.42  | 18.16 $\pm$<br>2.83  | nd                  | nd                     | nd |
| Dp-3-trans-cmglc                                       | nd                    | nd                   | nd | nd | nd | nd   | nd   | nd                    | 67.26 $\pm$<br>7.16  | tr                   | 13.64 $\pm$<br>1.16 | 1170.68 $\pm$<br>14.49 | nd |
| Pn-3-acglc                                             | 60.67 $\pm$<br>23.44  | 51.03 $\pm$<br>1.53  | nd | nd | nd | nd   | nd   | nd                    | nd                   | nd                   | nd                  | nd                     | nd |
| Mv-3-acglc                                             | 607.68 $\pm$<br>57.68 | 414.43 $\pm$<br>8.93 | nd | nd | nd | nd   | nd   | nd                    | 18.51 $\pm$<br>1.97  | nd                   | nd                  | 30.07 $\pm$<br>3.85    | nd |
| Cy-3-cis-cmglc                                         | nd                    | nd                   | nd | nd | nd | nd   | nd   | nd                    | nd                   | nd                   | nd                  | nd                     | nd |
| Pn-3-trans-cmglc-5-glc                                 | nd                    | nd                   | nd | nd | nd | nd   | nd   | nd                    | nd                   | nd                   | nd                  | nd                     | nd |
| Mv-3-trans-cmglc-5-glc                                 | nd                    | nd                   | nd | nd | nd | nd   | nd   | 522.16 $\pm$<br>14.01 | 147.97 $\pm$<br>8.64 | 583.23 $\pm$<br>8.37 | nd                  | 56.41 $\pm$<br>5.06    | nd |
| Pt-3-cis-cmglc                                         | nd                    | nd                   | nd | nd | nd | nd   | nd   | nd                    | 8.36 $\pm$<br>0.58   | nd                   | nd                  | nd                     | nd |
| Mv-3-cfglc                                             | 49.85 $\pm$<br>4.30   | 26.26 $\pm$<br>1.88  | nd | nd | nd | nd   | nd   | nd                    | 12.96 $\pm$<br>1.40  | nd                   | nd                  | 143.90 $\pm$<br>11.86  | nd |
| Cy-3-trans-cmglc                                       | nd                    | nd                   | nd | nd | nd | nd   | nd   | nd                    | 16.38 $\pm$<br>1.31  | nd                   | nd                  | 7.74 $\pm$<br>0.45     | nd |
| Pt-trans-cmglc                                         | 69.43 $\pm$<br>11.63  | 75.78 $\pm$<br>4.75  | nd | nd | nd | nd   | nd   | nd                    | 75.70 $\pm$<br>5.04  | 9.76 $\pm$<br>0.90   | nd                  | 344.38 $\pm$<br>5.20   | nd |
| Pt-3-cis-cmglc                                         | nd                    | nd                   | nd | nd | nd | nd   | nd   | nd                    | tr                   | nd                   | nd                  | nd                     | nd |

## Appendix 1. Cont.

| Cultivars <sup>c</sup>                    |                                 |                               |                              |                               |                                 |                                |                               |                                |                                |                              |                                |                               |                               |
|-------------------------------------------|---------------------------------|-------------------------------|------------------------------|-------------------------------|---------------------------------|--------------------------------|-------------------------------|--------------------------------|--------------------------------|------------------------------|--------------------------------|-------------------------------|-------------------------------|
| Compounds <sup>a,b</sup><br>(µg MGE/g DW) | CS                              | ML                            | CB                           | SH                            | SY                              | ZS-1                           | ZS-2                          | BP                             | MA                             | MI                           | SN                             | HS                            | ZH                            |
| Mv-3-cis-cmglc                            | nd                              | nd                            | nd                           | nd                            | nd                              | nd                             | nd                            | nd                             | 22.12 ± 5.10                   | nd                           | nd                             | nd                            | nd                            |
| Pt-3-trans-cmglc                          | 93.57 ± 11.48                   | 102.76 ± 13.74                | nd                           | nd                            | nd                              | nd                             | nd                            | tr                             | 219.00 ± 9.96                  | 8.38 ±0.96                   | tr                             | 10.97 ± 0.80                  | nd                            |
| Mv-3-trans-cmglc                          | 566.21 ± 80.04                  | 544.50 ± 74.54                | nd                           | nd                            | nd                              | nd                             | nd                            | 52.69 ± 6.51                   | 6.02 ±0.43                     | 70.23 ± 6.24                 | 7.17 ±0.35                     | 63.23 ± 6.29                  | nd                            |
| Total <sup>d</sup>                        | 4163.28 ± 151.49 <sup>e,f</sup> | 3158.11 ± 323.03 <sup>d</sup> | 4656.70 ± 72.26 <sup>g</sup> | 6595.13 ± 103.62 <sup>i</sup> | 4479.19 ± 125.29 <sup>f,g</sup> | 10036.96 ± 113.72 <sup>m</sup> | 14370.94 ± 16.04 <sup>o</sup> | 1607.43 ± 62.31 <sup>b,c</sup> | 1192.31 ± 85.32 <sup>a,b</sup> | 1801.37 ± 64.34 <sup>c</sup> | 11580.58 ± 127.70 <sup>n</sup> | 8029.36 ± 184.13 <sup>k</sup> | 13901.93 ± 47.90 <sup>o</sup> |

| Cultivars <sup>c</sup>                    |                 |                 |              |                 |              |              |                 |                 |                |                |  |
|-------------------------------------------|-----------------|-----------------|--------------|-----------------|--------------|--------------|-----------------|-----------------|----------------|----------------|--|
| Compounds <sup>a,b</sup><br>(µg MGE/g DW) | ZY              | BS              | CT           | CC              | NR           | MF           | CH              | SC              | AL             | NB             |  |
| Dp-3,5-diglc                              | 839.73 ±10.16   | 644.79 ±6.59    | 42.63 ±3.68  | 170.39 ±14.63   | nd           | 89.48 ±4.32  | 191.60 ±6.88    | 1038.96 ± 10.72 | 1318.86 ± 7.03 | 533.73 ± 15.56 |  |
| Cy-3,5-diglc                              | 452.11 ± 9.38   | 272.07 ±7.73    | 83.65 ±4.31  | 207.50 ±14.23   | 102.58 ±4.44 | 29.23 ±2.30  | 61.99 ±3.75     | 529.53 ±6.72    | 563.84 ±3.94   | 2006.81 ± 7.69 |  |
| Pt-3,5-diglc                              | 474.79 ±12.39   | 499.54 ±9.01    | 22.58 ±3.22  | 105.44 ±8.48    | nd           | 35.66 ±3.14  | 326.56 ±12.00   | 1426.36 ± 17.89 | 653.75 ±2.57   | 1137.16 ± 8.40 |  |
| Dp-3-glc                                  | 505.87 ±12.89   | 673.31 ±7.50    | 449.41 ±3.42 | 1137.04 ± 21.19 | 141.58 ±1.32 | 343.65 ±4.97 | 740.65 ±5.69    | 2383.92 ± 85.80 | nd             | nd             |  |
| Pg-3,5-diglc                              | nd              | nd              | nd           | nd              | nd           | nd           | nd              | nd              | 31.59 ±0.92    | 162.77 ±6.22   |  |
| Pn-3,5-diglc                              | 429.82 ± 7.37   | 568.77 ±6.19    | 43.61 ±2.29  | 167.92 ±11.13   | nd           | 36.16 ±5.77  | 251.64 ±4.40    | 498.54 ±8.57    | 190.00 ±5.91   | 1166.33 ± 7.24 |  |
| Mv-3,5-diglc                              | 1497.23 ± 10.12 | 1277.69 ± 11.36 | nd           | 192.40 ±8.20    | nd           | 268.32 ±8.62 | 2603.58 ± 13.62 | 2950.67 ± 14.55 | 162.06 ±7.26   | 542.11 ± 10.93 |  |

## Appendix 1. Cont.

| Compounds<br>( $\mu\text{g MGE/g DW}$ ) | Cultivars <sup>c</sup> |                    |                   |                    |                   |                    |                     |                     |    |    |
|-----------------------------------------|------------------------|--------------------|-------------------|--------------------|-------------------|--------------------|---------------------|---------------------|----|----|
|                                         | ZY                     | BS                 | CT                | CC                 | NR                | MF                 | CH                  | SC                  | AL | NB |
| Cy-3-glc                                | nd                     | 40.07 $\pm$ 7.30   | 643.38 $\pm$ 4.28 | 608.31 $\pm$ 20.59 | 741.42 $\pm$ 7.03 | nd                 | nd                  | nd                  | nd | nd |
| Pt-3-glc                                | 96.60 $\pm$ 4.76       | 231.98 $\pm$ 14.92 | 57.04 $\pm$ 2.46  | 252.17 $\pm$ 11.44 | 6.12 $\pm$ 0.68   | 404.02 $\pm$ 8.48  | 891.46 $\pm$ 8.38   | 1105.79 $\pm$ 1.52  | nd | nd |
| Pg-3-glc                                | nd                     | 47.45 $\pm$ 2.37   | nd                | nd                 | 9.50 $\pm$ 0.31   | nd                 | nd                  | nd                  | nd | nd |
| Cy-3-acglc-5-glc                        | nd                     | nd                 | nd                | nd                 | nd                | 7.08 $\pm$ 0.12    | nd                  | nd                  | nd | nd |
| Pt-3-acglc-5-glc                        | nd                     | 62.39 $\pm$ 0.30   | nd                | nd                 | nd                | nd                 | nd                  | 140.13 $\pm$ 0.59   | nd | nd |
| Pn-3-glc                                | 29.55 $\pm$ 2.99       | 134.85 $\pm$ 4.75  | 43.21 $\pm$ 1.71  | 93.29 $\pm$ 9.89   | 12.70 $\pm$ 0.19  | 39.56 $\pm$ 6.73   | 93.16 $\pm$ 8.18    | 106.07 $\pm$ 5.37   | nd | nd |
| Mv-3-glc                                | 95.39 $\pm$ 8.40       | 201.12 $\pm$ 5.90  | 18.39 $\pm$ 0.57  | 92.96 $\pm$ 9.42   | nd                | 1160.49 $\pm$ 5.49 | 1634.41 $\pm$ 13.57 | 488.69 $\pm$ 2.10   | nd | nd |
| Dp-3-cfglc-5-glc                        | nd                     | 79.81 $\pm$ 6.54   | nd                | nd                 | nd                | nd                 | nd                  | nd                  | nd | nd |
| Dp-3-cis-cmglc-5-glc                    | nd                     | 30.24 $\pm$ 0.84   | nd                | 91.26 $\pm$ 7.58   | nd                | nd                 | nd                  | nd                  | nd | nd |
| Pn-3-acglc-5-glc                        | nd                     | nd                 | nd                | nd                 | nd                | nd                 | nd                  | nd                  | nd | nd |
| Dp-3-acglc                              | nd                     | 73.15 $\pm$ 1.16   | nd                | nd                 | nd                | 34.04 $\pm$ 2.79   | 52.73 $\pm$ 0.11    | 169.32 $\pm$ 2.98   | nd | nd |
| Mv-3-acglc-5-glc                        | nd                     | 60.69 $\pm$ 1.71   | nd                | nd                 | nd                | 40.41 $\pm$ 6.05   | 27.98 $\pm$ 2.54    | 91.20 $\pm$ 1.17    | nd | nd |
| Dp-3-trans-cmglc-5-glc                  | nd                     | 1304.32 $\pm$ 2.52 | nd                | 319.62 $\pm$ 15.03 | nd                | 18.45 $\pm$ 0.28   | 132.03 $\pm$ 1.27   | 1666.21 $\pm$ 26.63 | nd | nd |
| Cy-3-acglc                              | nd                     | nd                 | nd                | 42.15 $\pm$ 6.18   | nd                | nd                 | nd                  | nd                  | nd | nd |
| Dp-3-cfglc                              | nd                     | nd                 | nd                | nd                 | nd                | nd                 | nd                  | nd                  | nd | nd |
| Pt-3-cis-cmglc-5-glc                    | nd                     | 55.27 $\pm$ 2.48   | nd                | 8.64 $\pm$ 0.55    | nd                | nd                 | 26.62 $\pm$ 3.01    | nd                  | nd | nd |
| Pt-3-acglc                              | nd                     | 45.40 $\pm$ 0.33   | nd                | 45.33 $\pm$ 2.82   | nd                | 45.55 $\pm$ 2.58   | 35.50 $\pm$ 0.98    | 77.05 $\pm$ 6.06    | nd | nd |
| Dp-3-cis-cmglc                          | nd                     | nd                 | nd                | nd                 | nd                | nd                 | nd                  | nd                  | nd | nd |
| Cy-3-cmglc-5-glc                        | nd                     | 336.70 $\pm$ 5.85  | nd                | 327.50 $\pm$ 13.16 | nd                | 13.57 $\pm$ 0.86   | nd                  | 289.80 $\pm$ 3.93   | nd | nd |
| Pt-3-trans-cmglc-5-glc                  | nd                     | 691.57 $\pm$ 6.55  | nd                | 132.72 $\pm$ 9.49  | nd                | 46.92 $\pm$ 3.35   | 192.26 $\pm$ 5.41   | 973.12 $\pm$ 25.51  | nd | nd |
| Mv-3-cfglc-5-glc                        | nd                     | nd                 | nd                | nd                 | nd                | nd                 | nd                  | nd                  | nd | nd |
| Pt-3-cfglc                              | nd                     | nd                 | nd                | nd                 | nd                | 10.43 $\pm$ 0.45   | 24.90 $\pm$ 1.38    | 15.36 $\pm$ 0.65    | nd | nd |
| Pn-3-cis-cmglc-5-glc                    | nd                     | 21.84 $\pm$ 1.05   | nd                | 11.97 $\pm$ 0.49   | nd                | nd                 | nd                  | nd                  | nd | nd |
| Mv-3-cis-cmglc-5-glc                    | nd                     | nd                 | nd                | nd                 | nd                | nd                 | nd                  | 48.24 $\pm$ 3.68    | nd | nd |
| Dp-3-trans-cmglc                        | nd                     | 462.59 $\pm$ 3.95  | 10.15 $\pm$ 0.35  | 798.26 $\pm$ 24.93 | 7.03 $\pm$ 0.55   | 38.37 $\pm$ 6.21   | 232.28 $\pm$ 7.65   | 1456.98 $\pm$ 3.10  | nd | nd |
| Pn-3-acglc                              | nd                     | nd                 | nd                | 92.07 $\pm$ 8.73   | nd                | 10.65 $\pm$ 0.36   | nd                  | nd                  | nd | nd |
| Mv-3-acglc                              | nd                     | 33.86 $\pm$ 3.21   | nd                | 15.90 $\pm$ 1.45   | nd                | 114.01 $\pm$ 4.30  | 29.44 $\pm$ 3.35    | 15.20 $\pm$ 0.64    | nd | nd |

## Appendix 1. Cont.

| Compounds <sup>a,b</sup> \ Cultivars <sup>c</sup> | ZY                                    | BS                                  | CT                                      | CC                                   | NR                                  | MF                                  | CH                                    | SC                                   | AL                                  | NB                                 |
|---------------------------------------------------|---------------------------------------|-------------------------------------|-----------------------------------------|--------------------------------------|-------------------------------------|-------------------------------------|---------------------------------------|--------------------------------------|-------------------------------------|------------------------------------|
| ( $\mu\text{g MGE/g DW}$ )                        |                                       |                                     |                                         |                                      |                                     |                                     |                                       |                                      |                                     |                                    |
| Cy-3-cis-cmglc                                    | nd                                    | nd                                  | nd                                      | 13.49 $\pm$ 0.91                     | 7.88 $\pm$ 0.49                     | nd                                  | nd                                    | nd                                   | nd                                  | nd                                 |
| Pn-3-trans-cmglc-5-glc                            | nd                                    | 328.97 $\pm$ 8.15                   | nd                                      | 90.20 $\pm$ 6.09                     | nd                                  | nd                                  | nd                                    | nd                                   | nd                                  | nd                                 |
| Mv-3-trans-cmglc-5-glc                            | nd                                    | 391.45 $\pm$ 6.03                   | nd                                      | 103.67 $\pm$ 8.83                    | nd                                  | 45.62 $\pm$ 1.12                    | 297.72 $\pm$ 4.43                     | 702.93 $\pm$ 7.93                    | nd                                  | nd                                 |
| Pt-3-cis-cmglc                                    | nd                                    | nd                                  | nd                                      | nd                                   | nd                                  | nd                                  | nd                                    | nd                                   | nd                                  | nd                                 |
| Mv-3-cfglc                                        | nd                                    | 104.37 $\pm$ 6.40                   | 36.06 $\pm$ 2.43                        | 454.79 $\pm$ 4.92                    | 36.82 $\pm$ 2.28                    | 10.99 $\pm$ 0.82                    | 26.38 $\pm$ 2.47                      | 157.78 $\pm$ 5.26                    | nd                                  | nd                                 |
| Cy-3-trans-cmglc                                  | nd                                    | nd                                  | nd                                      | nd                                   | nd                                  | 20.85 $\pm$ 1.17                    | 39.02 $\pm$ 6.10                      | nd                                   | nd                                  | nd                                 |
| Pt-trans-cmglc                                    | nd                                    | 92.60 $\pm$ 5.10                    | nd                                      | 132.89 $\pm$ 9.72                    | nd                                  | 28.41 $\pm$ 2.09                    | 200.85 $\pm$ 8.00                     | 346.48 $\pm$ 6.48                    | nd                                  | nd                                 |
| Pt-3-cis-cmglc                                    | nd                                    | nd                                  | nd                                      | nd                                   | nd                                  | nd                                  | nd                                    | nd                                   | nd                                  | nd                                 |
| Mv-3-cis-cmglc                                    | nd                                    | nd                                  | nd                                      | nd                                   | nd                                  | nd                                  | 13.12 $\pm$ 1.31                      | nd                                   | nd                                  | nd                                 |
| Pt-3-trans-cmglc                                  | nd                                    | 20.70 $\pm$ 0.58                    | 6.92 $\pm$ 0.25                         | 37.45 $\pm$ 4.89                     | nd                                  | 7.98 $\pm$ 0.39                     | 11.74 $\pm$ 1.14                      | 13.14 $\pm$ 0.23                     | nd                                  | nd                                 |
| Mv-3-trans-cmglc                                  | nd                                    | 55.25 $\pm$ 0.39                    | tr                                      | 47.69 $\pm$ 4.24                     | nd                                  | 49.41 $\pm$ 4.95                    | 313.01 $\pm$ 13.27                    | 149.52 $\pm$ 8.51                    | nd                                  | nd                                 |
| Total <sup>d</sup>                                | 4421.08 $\pm$<br>78.47 <sup>f,g</sup> | 8842.82 $\pm$<br>18.65 <sup>l</sup> | 1457.04 $\pm$<br>13.47 <sup>a,b,c</sup> | 5792.99 $\pm$<br>258.15 <sup>h</sup> | 1065.63 $\pm$<br>12.84 <sup>a</sup> | 2949.30 $\pm$<br>87.68 <sup>d</sup> | 8450.64 $\pm$<br>20.74 <sup>k,l</sup> | 16840.99 $\pm$<br>60.59 <sup>p</sup> | 2920.11 $\pm$<br>25.80 <sup>d</sup> | 5548.91 $\pm$<br>6.36 <sup>h</sup> |

nd means not detected. tr means trace. Abbreviations: dp, delphinidin; cy, cyanidin; pt, petunidin; pg, pelargonidin; pn, peonidin; mv, malvidin; glc, glucoside; diglc, diglucoside; acglc, (6-acetyl)-glucoside; cfglc, (6-caffeoyl)-glucoside; cmglc, (6-coumaroyl)-glucoside; <sup>a</sup> Each number represents an anthocyanin compound, see appendix 2; <sup>b</sup> Values are means of duplicate determination  $\pm$  S.D.; <sup>c</sup> Each abbreviation represents a cultivar, see Table 1; <sup>d</sup> Different letters in each column are significantly different at 0.05 level from ANOVA.

**Appendix 2.** Contents of non-anthocyanin phenolic compounds in the skins of different grape cultivars.

| Cultivars <sup>c</sup><br>Compounds <sup>a,b</sup>       | CS                   | ML                   | CB                   | SH                  | SY                  | ZS-1                | ZS-2                | BP                   | MA                   | MI                   | SN                    | HS                    | ZH                   |
|----------------------------------------------------------|----------------------|----------------------|----------------------|---------------------|---------------------|---------------------|---------------------|----------------------|----------------------|----------------------|-----------------------|-----------------------|----------------------|
| Flavonols and dihydroflavonols ( $\mu\text{g QE/g DW}$ ) |                      |                      |                      |                     |                     |                     |                     |                      |                      |                      |                       |                       |                      |
| Dk-3-glc                                                 | nd                   | nd                   | nd                   | nd                  | nd                  | nd                  | nd                  | nd                   | nd                   | nd                   | nd                    | nd                    | nd                   |
| K-3-hex                                                  | nd                   | nd                   | nd                   | nd                  | nd                  | nd                  | nd                  | nd                   | nd                   | nd                   | nd                    | nd                    | nd                   |
| Q-3-hex                                                  | nd                   | nd                   | nd                   | nd                  | nd                  | nd                  | nd                  | nd                   | nd                   | nd                   | nd                    | nd                    | 11.89 $\pm$<br>2.64  |
| M-3-gcn                                                  | nd                   | nd                   | nd                   | nd                  | nd                  | nd                  | nd                  | nd                   | nd                   | nd                   | 26.94 $\pm$<br>1.73   | nd                    | nd                   |
| Dq-3-hex                                                 | nd                   | 29.37 $\pm$<br>1.21  | 13.82 $\pm$<br>0.20  | nd                  | nd                  | nd                  | nd                  | nd                   | nd                   | 10.85 $\pm$<br>1.37  | nd                    | nd                    | 17.27 $\pm$<br>2.63  |
| M-3-gal                                                  | nd                   | nd                   | nd                   | nd                  | nd                  | nd                  | nd                  | nd                   | nd                   | nd                   | 55.95 $\pm$<br>3.81   | nd                    | 14.63 $\pm$<br>1.74  |
| M-3-glc                                                  | 19.78 $\pm$<br>3.84  | 20.96 $\pm$<br>10.73 | 13.96 $\pm$<br>0.59  | 41.44 $\pm$<br>0.24 | nd                  | 73.05 $\pm$<br>1.57 | 14.10 $\pm$<br>0.14 | nd                   | 23.91 $\pm$<br>0.16  | nd                   | 88.99 $\pm$<br>5.09   | 29.31 $\pm$<br>4.31   | 31.51 $\pm$<br>1.70  |
| M-3-rha                                                  | nd                   | nd                   | 18.30 $\pm$<br>0.73  | nd                  | nd                  | nd                  | nd                  | nd                   | nd                   | nd                   | 38.61 $\pm$<br>10.04  | nd                    | nd                   |
| Q                                                        | nd                   | nd                   | 147.55 $\pm$<br>7.59 | 40.84 $\pm$<br>0.79 | nd                  | 43.15 $\pm$<br>1.31 | 23.99 $\pm$<br>0.13 | nd                   | nd                   | nd                   | 70.67 $\pm$<br>11.86  | nd                    | 129.12 $\pm$<br>2.72 |
| Dq-3-rha                                                 | 30.23 $\pm$<br>0.33  | 76.70 $\pm$<br>0.92  | nd                   | nd                  | nd                  | nd                  | nd                  | nd                   | nd                   | nd                   | nd                    | nd                    | nd                   |
| Q-3-gal                                                  | 26.06 $\pm$<br>0.08  | 11.94 $\pm$<br>4.37  | 16.54 $\pm$<br>0.37  | 12.94 $\pm$<br>0.44 | nd                  | nd                  | nd                  | nd                   | nd                   | nd                   | 39.09 $\pm$<br>4.55   | nd                    | nd                   |
| Q-3-gcn                                                  | 46.33 $\pm$<br>2.70  | 33.32 $\pm$<br>3.63  | 108.79 $\pm$<br>2.95 | 26.50 $\pm$<br>0.10 | 48.08 $\pm$<br>1.44 | 37.39 $\pm$<br>0.02 | 36.90 $\pm$<br>0.44 | 16.13 $\pm$<br>0.52  | 166.95 $\pm$<br>4.89 | 11.84 $\pm$<br>0.26  | 89.79 $\pm$<br>6.91   | 141.04 $\pm$<br>22.05 | 37.42 $\pm$<br>2.58  |
| Q-3-glc                                                  | 115.06 $\pm$<br>1.81 | 56.66 $\pm$<br>2.07  | 120.00 $\pm$<br>1.91 | 77.66 $\pm$<br>0.38 | 19.00 $\pm$<br>1.59 | 38.68 $\pm$<br>0.61 | 38.30 $\pm$<br>0.10 | 20.53 $\pm$<br>0.64  | 32.56 $\pm$<br>0.27  | 16.92 $\pm$<br>0.11  | 155.21 $\pm$<br>5.57  | 25.75 $\pm$<br>5.19   | 39.35 $\pm$<br>4.19  |
| Q-3-rut                                                  | nd                   | nd                   | nd                   | nd                  | nd                  | nd                  | nd                  | nd                   | nd                   | nd                   | 18.58 $\pm$<br>2.80   | 223.00 $\pm$<br>8.15  | nd                   |
| Q-3-rha                                                  | nd                   | nd                   | nd                   | nd                  | nd                  | nd                  | nd                  | 271.28 $\pm$<br>1.64 | 26.60 $\pm$<br>0.97  | 178.80 $\pm$<br>3.71 | 528.65 $\pm$<br>23.88 | nd                    | nd                   |

## Appendix 2. Cont.

| Cultivars <sup>c</sup><br>Compounds <sup>a,b</sup> | CS                                 | ML                                 | CB                                   | SH                                 | SY                           | ZS-1                                | ZS-2                            | BP                                  | MA                                 | MI                                   | SN                               | HS                               | ZH                                 |
|----------------------------------------------------|------------------------------------|------------------------------------|--------------------------------------|------------------------------------|------------------------------|-------------------------------------|---------------------------------|-------------------------------------|------------------------------------|--------------------------------------|----------------------------------|----------------------------------|------------------------------------|
| Flavonols and dihydroflavonols (µg QE/g DW)        |                                    |                                    |                                      |                                    |                              |                                     |                                 |                                     |                                    |                                      |                                  |                                  |                                    |
| L-3-glc                                            | 16.55 ±<br>0.19                    | 23.53 ±<br>0.93                    | nd                                   | nd                                 | nd                           | nd                                  | nd                              | 9.99 ±<br>0.26                      | nd                                 | 8.81 ±0.35                           | 15.87 ±<br>4.80                  | 19.02 ±<br>1.85                  | nd                                 |
| K-3-gal                                            | 13.67 ±<br>1.57                    | nd                                 | nd                                   | nd                                 | nd                           | nd                                  | nd                              | nd                                  | nd                                 | nd                                   | nd                               | nd                               | nd                                 |
| Q-3-xyl                                            | nd                                 | nd                                 | nd                                   | nd                                 | nd                           | nd                                  | nd                              | 14.79 ±<br>0.02                     | 47.22 ±<br>1.22                    | 12.41 ±<br>1.33                      | 38.01 ±<br>6.00                  | nd                               | 41.65 ±<br>2.30                    |
| I-3-xyl                                            | nd                                 | nd                                 | nd                                   | nd                                 | nd                           | nd                                  | nd                              | nd                                  | nd                                 | nd                                   | 24.03 ±<br>6.27                  | nd                               | nd                                 |
| K-3-rha                                            | nd                                 | nd                                 | nd                                   | nd                                 | nd                           | nd                                  | nd                              | tr                                  | 16.34 ±<br>0.48                    | nd                                   | 57.18 ±<br>9.97                  | nd                               | nd                                 |
| Dk-3-rha                                           | nd                                 | nd                                 | nd                                   | nd                                 | nd                           | nd                                  | nd                              | nd                                  | nd                                 | nd                                   | 26.68 ±<br>6.58                  | nd                               | nd                                 |
| K-3-glc                                            | 102.68 ±<br>26.00                  | nd                                 | nd                                   | nd                                 | nd                           | nd                                  | nd                              | nd                                  | nd                                 | nd                                   | nd                               | nd                               | nd                                 |
| L-3-acglc                                          | nd                                 | nd                                 | nd                                   | nd                                 | nd                           | nd                                  | nd                              | nd                                  | 49.37 ±<br>4.76                    | nd                                   | 62.68 ±<br>9.77                  | nd                               | 24.40 ±<br>0.73                    |
| I-3-glc                                            | 171.53 ±<br>35.68                  | nd                                 | nd                                   | nd                                 | nd                           | nd                                  | nd                              | 13.09 ±<br>0.71                     | nd                                 | 13.16 ±<br>2.98                      | 21.23 ±<br>3.42                  | nd                               | 12.22 ±<br>0.62                    |
| I-3-rha                                            | nd                                 | nd                                 | nd                                   | nd                                 | nd                           | nd                                  | nd                              | nd                                  | 10.68 ±<br>0.12                    | nd                                   | nd                               | nd                               | nd                                 |
| S-3-glc                                            | 69.85 ±<br>23.60                   | 63.35 ±<br>24.11                   | nd                                   | nd                                 | nd                           | nd                                  | nd                              | 46.55 ±<br>3.25                     | 12.10 ±<br>0.67                    | 63.58 ±<br>8.26                      | nd                               | nd                               | nd                                 |
| Dq-3-acglc                                         | nd                                 | nd                                 | nd                                   | nd                                 | nd                           | nd                                  | nd                              | nd                                  | nd                                 | nd                                   | nd                               | nd                               | nd                                 |
| K-3-rut                                            | nd                                 | nd                                 | nd                                   | nd                                 | nd                           | nd                                  | nd                              | nd                                  | nd                                 | 9.88 ±0.31                           | nd                               | nd                               | nd                                 |
| Tota l <sup>d</sup>                                | 611.75 ±<br>39.84 <sup>g,h,i</sup> | 315.83 ±<br>41.98 <sup>b,c,d</sup> | 438.97 ±<br>13.61 <sup>e,f,g,h</sup> | 199.3 ±<br>1.75 <sup>a,b,c,d</sup> | 67.08 ±<br>3.03 <sup>a</sup> | 192.27 ±<br>2.26 <sup>a,b,c,d</sup> | 113.29 ±<br>0.36 <sup>a,b</sup> | 392.36 ±<br>0.88 <sup>d,e,f,g</sup> | 385.74 ±<br>11.02 <sup>d,e,f</sup> | 326.26 ±<br>18.68 <sup>b,c,d,e</sup> | 1358.17 ±<br>123.03 <sup>k</sup> | 613.97 ±<br>48.46 <sup>h,i</sup> | 359.46 ±<br>15.11 <sup>c,d,e</sup> |

## Appendix 2. Cont.

| Cultivars <sup>c</sup><br>Compounds <sup>a,b</sup> | CS                        | ML                                | CB                              | SH           | SY           | ZS-1        | ZS-2        | BP                        | MA                        | MI                        | SN                        | HS                           | ZH          |
|----------------------------------------------------|---------------------------|-----------------------------------|---------------------------------|--------------|--------------|-------------|-------------|---------------------------|---------------------------|---------------------------|---------------------------|------------------------------|-------------|
| Flavan-3-ols (µg CE/g DW)                          |                           |                                   |                                 |              |              |             |             |                           |                           |                           |                           |                              |             |
| Gallocatechin                                      | nd                        | 9.64 ± 0.08                       | nd                              | nd           | nd           | nd          | nd          | nd                        | nd                        | nd                        | nd                        | nd                           | nd          |
| Epigallocatechin                                   | nd                        | nd                                | nd                              | nd           | nd           | nd          | nd          | nd                        | nd                        | nd                        | nd                        | nd                           | nd          |
| Catechin                                           | 9.90 ± 0.30               | 34.13 ± 1.69                      | nd                              | nd           | nd           | nd          | nd          | nd                        | nd                        | nd                        | 22.42 ± 1.22              | nd                           | nd          |
| Epicatechin                                        | nd                        | 13.09 ± 0.16                      | nd                              | nd           | nd           | nd          | nd          | 16.46 ± 1.14              | 16.08 ± 7.05              | 14.30 ± 4.83              | 28.66 ± 6.40              | nd                           | nd          |
| Procyanidin dimer 1                                | 50.99 ± 1.27              | 73.11 ± 27.48                     | 381.80 ± 12.38                  | nd           | nd           | nd          | nd          | nd                        | nd                        | nd                        | 18.88 ± 2.55              | 562.73 ± 308.23              | nd          |
| Procyanidin dimer 2                                | nd                        | 12.12 ± 0.13                      | nd                              | nd           | nd           | nd          | nd          | nd                        | nd                        | nd                        | nd                        | nd                           | nd          |
| Procyanidin dimer 3                                | nd                        | 58.22 ± 22.25                     | nd                              | nd           | nd           | nd          | nd          | nd                        | nd                        | nd                        | nd                        | nd                           | nd          |
| Procyanidin trimer                                 | nd                        | 9.53 ± 0.85                       | nd                              | nd           | nd           | nd          | nd          | nd                        | nd                        | nd                        | nd                        | nd                           | nd          |
| Total <sup>d</sup>                                 | 60.89 ± 0.97 <sup>a</sup> | 209.84 ± 47.39 <sup>a,b,c,d</sup> | 381.80 ± 12.38 <sup>c,d,e</sup> | nd           | nd           | nd          | nd          | 16.46 ± 1.14 <sup>a</sup> | 16.08 ± 7.05 <sup>a</sup> | 14.30 ± 4.83 <sup>a</sup> | 69.96 ± 2.62 <sup>a</sup> | 562.73 ± 308.23 <sup>e</sup> | nd          |
| Cinnamic acids (µg CAE/g DW)                       |                           |                                   |                                 |              |              |             |             |                           |                           |                           |                           |                              |             |
| Chlorogenic acid                                   | 1.33 ± 0.00               | nd                                | 8.16 ± 0.08                     | 10.16 ± 0.45 | 10.00 ± 0.28 | 8.17 ± 0.15 | 8.04 ± 0.14 | 7.43 ± 0.03               | 10.04 ± 0.03              | 6.09 ± 0.03               | nd                        | 9.82 ± 0.86                  | 7.67 ± 0.16 |
| Caffeic acid                                       | nd                        | nd                                | nd                              | nd           | 10.36 ± 0.33 | nd          | nd          | nd                        | nd                        | nd                        | nd                        | nd                           | nd          |
| Caftaric acid                                      | nd                        | nd                                | 16.40 ± 0.99                    | nd           | nd           | nd          | nd          | 22.65 ± 0.12              | 24.16 ± 0.07              | 13.86 ± 0.10              | nd                        | nd                           | nd          |

## Appendix 2. Cont.

| Cultivars <sup>c</sup><br>Compounds <sup>a,b</sup> | CS                               | ML                                  | CB                                 | SH                                | SY                             | ZS-1                              | ZS-2                              | BP                                | MA                           | MI                            | SN                              | HS                              | ZH                                |
|----------------------------------------------------|----------------------------------|-------------------------------------|------------------------------------|-----------------------------------|--------------------------------|-----------------------------------|-----------------------------------|-----------------------------------|------------------------------|-------------------------------|---------------------------------|---------------------------------|-----------------------------------|
| Cinnamic acids (µg CAE/g DW)                       |                                  |                                     |                                    |                                   |                                |                                   |                                   |                                   |                              |                               |                                 |                                 |                                   |
| <i>p</i> -Coumaric acid                            | nd                               | nd                                  | nd                                 | nd                                | nd                             | nd                                | nd                                | nd                                | 11.45 ± 0.17                 | 3.70 ± 0.22                   | nd                              | 9.85 ± 1.38                     | nd                                |
| Ferulic acid                                       | nd                               | nd                                  | nd                                 | nd                                | 58.44 ± 2.62                   | nd                                | 19.97 ± 0.06                      | 54.78 ± 3.05                      | nd                           | 5.02 ± 2.35                   | nd                              | nd                              | 17.30 ± 0.18                      |
| HE of caffeic acid                                 | nd                               | nd                                  | nd                                 | nd                                | nd                             | nd                                | nd                                | nd                                | nd                           | nd                            | nd                              | nd                              | nd                                |
| HE of <i>p</i> -coumaric acid                      | nd                               | nd                                  | nd                                 | nd                                | nd                             | nd                                | nd                                | nd                                | nd                           | nd                            | 16.36 ± 1.85                    | nd                              | nd                                |
| HE of ferulic acid                                 | nd                               | tr                                  | nd                                 | nd                                | nd                             | nd                                | 0.81 ± 0.35                       | 131.33 ± 24.04                    | 10.29 ± 0.38                 | 4.06 ± 3.01                   | 6.31 ± 0.77                     | 10.26 ± 2.15                    | 14.38 ± 1.46                      |
| Fertaric acid                                      | nd                               | nd                                  | 85.17 ± 3.42                       | 60.37 ± 3.38                      | nd                             | 29.92 ± 0.61                      | 33.08 ± 0.82                      | nd                                | 118.19 ± 1.87                | 196.63 ± 8.67                 | nd                              | 25.11 ± 4.88                    | 10.49 ± 2.63                      |
| Total <sup>d</sup>                                 | 1.33 ± 0.00 <sup>a</sup>         | tr                                  | 109.73 ± 2.51 <sup>g</sup>         | 70.53 ± 2.93 <sup>e,f,g</sup>     | 78.80 ± 2.57 <sup>f,g</sup>    | 38.08 ± 0.46 <sup>a,b,c,d,e</sup> | 61.90 ± 0.97 <sup>d,e,f</sup>     | 216.19 ± 27.17 <sup>i</sup>       | 174.13 ± 1.29 <sup>h</sup>   | 229.37 ± 7.66 <sup>i</sup>    | 22.68 ± 1.07 <sup>a,b,c,d</sup> | 55.04 ± 0.49 <sup>c,d,e,f</sup> | 49.83 ± 1.18 <sup>b,c,d,e,f</sup> |
| Benzoic acids (µg GAE/g DW)                        |                                  |                                     |                                    |                                   |                                |                                   |                                   |                                   |                              |                               |                                 |                                 |                                   |
| HE of protocatechuic acid                          | 0.91 ± 0.08                      | nd                                  | 6.65 ± 0.93                        | 8.66 ± 0.57                       | 6.36 ± 0.10                    | 3.10 ± 1.54                       | 7.26 ± 1.11                       | 5.72 ± 1.43                       | 7.09 ± 0.11                  | 5.24 ± 0.37                   | 12.59 ± 0.81                    | nd                              | 3.02 ± 1.72                       |
| protocatechuic acid                                | nd                               | nd                                  | nd                                 | nd                                | 1.56 ± 0.14                    | nd                                | nd                                | nd                                | nd                           | nd                            | nd                              | nd                              | nd                                |
| <i>p</i> -Hydroxybenzoic acid                      | nd                               | nd                                  | nd                                 | nd                                | nd                             | nd                                | nd                                | 3.70 ± 0.03                       | nd                           | 3.40 ± 0.04                   | nd                              | nd                              | nd                                |
| Ethyl gallate                                      | nd                               | nd                                  | nd                                 | nd                                | nd                             | nd                                | nd                                | nd                                | nd                           | 13.05 ± 0.26                  | nd                              | nd                              | nd                                |
| HE of vanillic acid                                | 7.73 ± 0.38                      | 10.17 ± 1.95                        | 2.84 ± 0.18                        | 6.64 ± 0.58                       | nd                             | 3.43 ± 0.17                       | 4.28 ± 2.04                       | 3.45 ± 3.33                       | nd                           | nd                            | 15.27 ± 2.09                    | 7.32 ± 3.25                     | 11.17 ± 2.26                      |
| Total <sup>d</sup>                                 | 8.64 ± 0.30 <sup>b,c,d,e,f</sup> | 10.17 ± 1.95 <sup>b,c,d,e,f,g</sup> | 9.49 ± 0.74 <sup>b,c,d,e,f,g</sup> | 15.30 ± 0.01 <sup>f,g,h,i,j</sup> | 7.92 ± 0.03 <sup>b,c,d,e</sup> | 6.53 ± 1.38 <sup>a,b,c</sup>      | 11.54 ± 0.93 <sup>c,d,e,f,g</sup> | 12.86 ± 1.93 <sup>c,d,e,f,g</sup> | 7.09 ± 0.11 <sup>a,b,c</sup> | 21.70 ± 0.60 <sup>j,k,l</sup> | 27.85 ± 1.28 <sup>l</sup>       | 7.32 ± 3.25 <sup>a,b,c,d</sup>  | 14.19 ± 0.54 <sup>d,e,f,g,h</sup> |

## Appendix 2. Cont.

| <div>Cultivars<sup>c</sup></div> <div>Compounds<sup>a,b</sup></div> | CS                           | ML                            | CB               | SH             | SY                          | ZS-1 | ZS-2           | BP                          | MA                            | MI                          | SN                           | HS                           | ZH                          |
|---------------------------------------------------------------------|------------------------------|-------------------------------|------------------|----------------|-----------------------------|------|----------------|-----------------------------|-------------------------------|-----------------------------|------------------------------|------------------------------|-----------------------------|
| Ellagic acids (μg EAE/g DW)                                         |                              |                               |                  |                |                             |      |                |                             |                               |                             |                              |                              |                             |
| Ellagic acid-rha                                                    | nd                           | nd                            | nd               | nd             | nd                          | nd   | nd             | nd                          | nd                            | nd                          | nd                           | nd                           | nd                          |
| HHDP-galloylglucose                                                 | nd                           | nd                            | nd               | nd             | nd                          | nd   | nd             | nd                          | nd                            | nd                          | nd                           | nd                           | nd                          |
| HHDP-glucose                                                        | nd                           | nd                            | nd               | nd             | nd                          | nd   | nd             | nd                          | nd                            | nd                          | nd                           | nd                           | nd                          |
| Ellagitannin 1                                                      | nd                           | nd                            | nd               | nd             | nd                          | nd   | nd             | nd                          | nd                            | nd                          | nd                           | nd                           | nd                          |
| Ellagitannin 2                                                      | nd                           | nd                            | nd               | nd             | nd                          | nd   | nd             | nd                          | nd                            | nd                          | nd                           | nd                           | nd                          |
| Total <sup>d</sup>                                                  | nd                           | nd                            | nd               | nd             | nd                          | nd   | nd             | nd                          | nd                            | nd                          | nd                           | nd                           | nd                          |
| Stilbenes (μg RE/g DW)                                              |                              |                               |                  |                |                             |      |                |                             |                               |                             |                              |                              |                             |
| <i>trans</i> -Piceid                                                | tr                           | 5.01 ±0.71                    | nd               | nd             | tr                          | tr   | nd             | nd                          | nd                            | 8.67 ±3.16                  | nd                           | 3.64 ±<br>0.05               | 3.64 ±<br>0.05              |
| <i>trans</i> -Resveratrol                                           | 26.83 ±<br>0.86              | 162.05 ±<br>6.49              | nd               | 3.79 ±<br>0.45 | nd                          | nd   | 2.83 ±<br>0.37 | 22.37 ±<br>0.80             | 2.17 ±0.14                    | 67.09 ±<br>2.44             | 27.31 ±<br>5.15              | tr                           | tr                          |
| Total <sup>d</sup>                                                  | 26.83 ±<br>0.86 <sup>c</sup> | 167.06 ±<br>7.21 <sup>e</sup> | tr               | nd             | 3.79 ±<br>0.45 <sup>a</sup> | tr   | tr             | 2.83 ±<br>0.37 <sup>a</sup> | 22.37 ±<br>0.80 <sup>bc</sup> | 2.17 ±<br>0.14 <sup>a</sup> | 75.76 ±<br>0.72 <sup>d</sup> | 27.31 ±<br>5.15 <sup>c</sup> | 3.64 ±<br>0.05 <sup>a</sup> |
|                                                                     |                              |                               |                  |                |                             |      |                |                             |                               |                             |                              |                              |                             |
| <div>Cultivars<sup>c</sup></div> <div>Compounds<sup>a,b</sup></div> | ZY                           | BS                            | CT               | CC             | NR                          | MF   | CH             | SC                          | AL                            | NB                          |                              |                              |                             |
| Flavonols (μg QE/g DW)                                              |                              |                               |                  |                |                             |      |                |                             |                               |                             |                              |                              |                             |
| Dk-3-glc                                                            | nd                           | nd                            | nd               | nd             | nd                          | nd   | nd             | nd                          | nd                            | 133.35 ±11.36               |                              |                              |                             |
| K-3-hex                                                             | nd                           | nd                            | 47.07 ±<br>12.57 | 29.68 ±1.68    | 53.11 ±0.78                 | nd   | nd             | nd                          | nd                            | nd                          |                              |                              |                             |
| Q-3-hex                                                             | nd                           | nd                            | 21.36 ±0.24      | 18.10 ±0.59    | 28.70 ±0.71                 | nd   | 16.05 ±1.82    | nd                          | 43.20 ±4.08                   | 18.40 ±2.46                 |                              |                              |                             |
| M-3-gcn                                                             | nd                           | nd                            | nd               | nd             | nd                          | nd   | nd             | nd                          | nd                            | nd                          |                              |                              |                             |
| Dq-3-hex                                                            | nd                           | nd                            | 12.49 ±5.64      | nd             | 12.80 ±2.71                 | nd   | nd             | 8.87 ±0.47                  | nd                            | nd                          |                              |                              |                             |
| M-3-gal                                                             | nd                           | 11.34 ±2.65                   | nd               | nd             | nd                          | nd   | nd             | nd                          | nd                            | nd                          |                              |                              |                             |
| M-3-glc                                                             | 47.20 ±1.42                  | 12.52 ±2.79                   | nd               | 19.58 ±0.95    | nd                          | nd   | 20.50 ±3.01    | 18.94 ±2.53                 | 30.12 ±<br>15.98              | 38.50 ±<br>17.82            |                              |                              |                             |
| M-3-rha                                                             | nd                           | nd                            | nd               | nd             | 37.72 ±2.05                 | nd   | nd             | nd                          | 238.31 ±<br>23.13             | 193.38 ±<br>40.61           |                              |                              |                             |

## Appendix 2. Cont.

| Compounds <sup>ab</sup> | Cultivars <sup>c</sup> |               |              |                |                |              |               |               |                |                |
|-------------------------|------------------------|---------------|--------------|----------------|----------------|--------------|---------------|---------------|----------------|----------------|
|                         | ZY                     | BS            | CT           | CC             | NR             | MF           | CH            | SC            | AL             | NB             |
| Flavonols (µg QE/g DW)  |                        |               |              |                |                |              |               |               |                |                |
| Q                       | 34.02 ± 1.58           | 95.29 ± 2.18  | nd           | nd             | nd             | 69.21 ± 5.41 | 39.19 ± 0.65  | nd            | 557.43 ± 44.70 | 452.60 ± 60.33 |
| Dq-3-rha                | nd                     | nd            | 9.41 ± 0.07  | 69.93 ± 3.29   | nd             | nd           | nd            | nd            | nd             | nd             |
| Q-3-gal                 | 19.49 ± 2.15           | 16.40 ± 1.09  | nd           | nd             | nd             | nd           | 19.46 ± 0.94  | nd            | nd             | nd             |
| Q-3-gcn                 | 54.81 ± 3.16           | 192.28 ± 6.81 | 88.97 ± 2.60 | 122.82 ± 5.75  | 212.12 ± 5.05  | 35.54 ± 5.02 | 272.54 ± 0.89 | 55.90 ± 2.76  | nd             | nd             |
| Q-3-glc                 | 85.48 ± 5.37           | 131.29 ± 8.46 | 68.01 ± 0.36 | 111.25 ± 4.98  | 369.49 ± 17.69 | 7.71 ± 0.66  | 166.18 ± 0.78 | 35.54 ± 4.27  | nd             | nd             |
| Q-3-rut                 | nd                     | 19.51 ± 4.48  | nd           | 278.92 ± 35.91 | nd             | nd           | 18.03 ± 0.15  | 100.95 ± 4.11 | nd             | nd             |
| Q-3-rha                 | nd                     | 30.65 ± 0.20  | nd           | 57.43 ± 6.93   | 176.20 ± 15.77 | nd           | 15.13 ± 1.97  | nd            | 630.48 ± 61.26 | 675.03 ± 77.85 |
| L-3-glc                 | nd                     | 13.21 ± 3.69  | nd           | nd             | nd             | nd           | 12.96 ± 0.67  | 11.26 ± 1.98  | nd             | nd             |
| K-3-gal                 | nd                     | nd            | nd           | nd             | nd             | nd           | nd            | nd            | nd             | 26.66 ± 18.68  |
| Q-3-xyl                 | nd                     | 33.98 ± 4.14  | nd           | nd             | nd             | 26.25 ± 1.32 | 16.25 ± 6.23  | nd            | 240.55 ± 39.02 | 247.53 ± 0.17  |
| I-3-xyl                 | nd                     | nd            | nd           | nd             | 40.20 ± 1.25   | nd           | nd            | nd            | nd             | 28.30 ± 26.95  |
| K-3-rha                 | nd                     | nd            | nd           | nd             | nd             | nd           | nd            | nd            | 64.65 ± 4.70   | 63.09 ± 2.39   |
| Dk-3-rha                | nd                     | nd            | nd           | 17.70 ± 2.59   | nd             | nd           | nd            | nd            | nd             | nd             |
| K-3-glc                 | nd                     | nd            | nd           | nd             | nd             | nd           | nd            | nd            | 26.09 ± 2.43   | 15.69 ± 1.27   |
| L-3-acglc               | nd                     | nd            | nd           | nd             | nd             | nd           | nd            | nd            | nd             | nd             |
| I-3-glc                 | nd                     | nd            | 12.07 ± 0.45 | nd             | 33.31 ± 2.94   | nd           | nd            | nd            | nd             | nd             |
| I-3-rha                 | nd                     | nd            | nd           | nd             | nd             | nd           | nd            | nd            | 26.16 ± 7.08   | nd             |
| S-3-glc                 | nd                     | 27.28 ± 1.74  | 17.72 ± 3.58 | nd             | nd             | nd           | 15.97 ± 0.85  | nd            | nd             | nd             |
| Dq-3-acglc              | nd                     | 23.57 ± 3.37  | nd           | nd             | nd             | nd           | nd            | 44.81 ± 2.69  | nd             | nd             |

## Appendix 2. Cont.

| Cultivars <sup>c</sup><br>Compounds <sup>ab</sup> | ZY                                  | BS                            | CT                                  | CC                             | NR                           | MF                              | CH                              | SC                              | AL                                | NB                            |
|---------------------------------------------------|-------------------------------------|-------------------------------|-------------------------------------|--------------------------------|------------------------------|---------------------------------|---------------------------------|---------------------------------|-----------------------------------|-------------------------------|
| Flavonols (µg QE/g DW)                            |                                     |                               |                                     |                                |                              |                                 |                                 |                                 |                                   |                               |
| K-3-rut                                           | nd                                  | 19.51 ± 4.48                  | nd                                  | 475.01 ± 22.17                 | 61.20 ± 0.52                 | nd                              | nd                              | 100.54 ± 2.66                   | nd                                | nd                            |
| Total <sup>d</sup>                                | 241.00 ± 13.68 <sup>a,b,c,d,e</sup> | 626.81 ± 25.98 <sup>h,i</sup> | 277.09 ± 13.61 <sup>a,b,c,d,e</sup> | 1200.41 ± 34.15 <sup>j,k</sup> | 1024.86 ± 47.31 <sup>j</sup> | 138.70 ± 12.40 <sup>a,b,c</sup> | 612.25 ± 6.95 <sup>g,h,i</sup>  | 376.81 ± 10.77 <sup>d,e,f</sup> | 1856.99 ± 202.38 <sup>l</sup>     | 1892.53 ± 53.60 <sup>l</sup>  |
| Flavan-3-ols (µg CE/g DW)                         |                                     |                               |                                     |                                |                              |                                 |                                 |                                 |                                   |                               |
| Gallocatechin                                     | nd                                  | nd                            | nd                                  | nd                             | nd                           | nd                              | nd                              | nd                              | 15.34 ± 0.21                      | 20.72 ± 0.80                  |
| Epigallocatechin                                  | nd                                  | nd                            | nd                                  | nd                             | nd                           | nd                              | nd                              | nd                              | 21.05 ± 0.27                      | 33.45 ± 3.21                  |
| Catechin                                          | nd                                  | nd                            | nd                                  | 25.68 ± 0.09                   | nd                           | 15.85 ± 0.34                    | 25.90 ± 5.36                    | nd                              | 65.71 ± 2.95                      | nd                            |
| Epicatechin                                       | nd                                  | nd                            | nd                                  | nd                             | nd                           | nd                              | nd                              | nd                              | 163.53 ± 16.15                    | 284.03 ± 34.18                |
| Procyanidin dimer 1                               | nd                                  | 6.45 ± 0.64                   | 9.66 ± 1.64                         | 155.58 ± 3.39                  | 1198.00 ± 25.56              | nd                              | 154.99 ± 10.24                  | 55.80 ± 14.96                   | 31.55 ± 3.06                      | 113.28 ± 10.79                |
| Procyanidin dimer 2                               | nd                                  | nd                            | nd                                  | nd                             | nd                           | nd                              | nd                              | nd                              | 53.44 ± 12.22                     | nd                            |
| Procyanidin dimer 3                               | nd                                  | nd                            | nd                                  | nd                             | nd                           | nd                              | nd                              | nd                              | nd                                | nd                            |
| Procyanidin trimer                                | nd                                  | nd                            | nd                                  | nd                             | 45.67 ± 2.98                 | nd                              | nd                              | nd                              | nd                                | nd                            |
| Total <sup>d</sup>                                | nd                                  | 6.45 ± 0.64 <sup>a</sup>      | 9.66 ± 1.64 <sup>a</sup>            | 181.26 ± 3.30 <sup>a,b,c</sup> | 1243.67 ± 28.54 <sup>f</sup> | 15.85 ± 0.34 <sup>a</sup>       | 180.89 ± 15.60 <sup>a,b,c</sup> | 55.80 ± 14.96 <sup>a</sup>      | 350.62 ± 36.67 <sup>b,c,d,e</sup> | 451.48 ± 48.98 <sup>d,e</sup> |
| Cinnamic acids (µg CAE/g DW)                      |                                     |                               |                                     |                                |                              |                                 |                                 |                                 |                                   |                               |
| Chlorogenic acid                                  | tr                                  | 7.66 ± 0.16                   | 0.38 ± 0.02                         | 8.85 ± 0.09                    | 7.64 ± 0.42                  | 0.71 ± 0.32                     | 7.09 ± 0.02                     | 6.80 ± 0.00                     | 7.89 ± 0.11                       | 8.26 ± 0.12                   |
| Caffeic acid                                      | nd                                  | nd                            | 0.95 ± 0.07                         | 5.55 ± 0.01                    | nd                           | nd                              | nd                              | nd                              | nd                                | nd                            |
| Caftaric acid                                     | nd                                  | nd                            | nd                                  | nd                             | nd                           | nd                              | nd                              | nd                              | nd                                | nd                            |
| p-Coumaric acid                                   | nd                                  | nd                            | nd                                  | 8.99 ± 0.10                    | nd                           | nd                              | 23.75 ± 3.13                    | nd                              | 14.80 ± 2.35                      | nd                            |
| Ferulic acid                                      | 36.13 ± 0.94                        | 32.58 ± 1.90                  | 17.02 ± 3.17                        | nd                             | nd                           | 7.87 ± 1.07                     | nd                              | 7.53 ± 5.54                     | nd                                | nd                            |
| HE of caffeic acid                                | nd                                  | nd                            | nd                                  | nd                             | nd                           | nd                              | nd                              | nd                              | 35.29 ± 4.58                      | nd                            |
| HE of p-coumaric acid                             | nd                                  | nd                            | nd                                  | nd                             | nd                           | nd                              | nd                              | 9.79 ± 2.45                     | nd                                | 8.29 ± 0.72                   |
| HE of ferulic acid                                | 183.29 ± 39.52                      | 9.19 ± 0.81                   | 10.36 ± 0.34                        | 26.55 ± 1.46                   | 6.64 ± 1.02                  | 1.25 ± 0.03                     | 2.23 ± 0.34                     | 8.97 ± 3.34                     | nd                                | 8.34 ± 1.68                   |

## Appendix 2. Cont.

| Cultivars <sup>c</sup><br>Compounds <sup>ab</sup> | ZY                              | BS                                | CT                              | CC                                | NR                            | MF                           | CH                                | SC                                | AL                                | NB                              |
|---------------------------------------------------|---------------------------------|-----------------------------------|---------------------------------|-----------------------------------|-------------------------------|------------------------------|-----------------------------------|-----------------------------------|-----------------------------------|---------------------------------|
| Cinnamic acids (µg CAE/g DW)                      |                                 |                                   |                                 |                                   |                               |                              |                                   |                                   |                                   |                                 |
| Fertaric acid                                     | nd                              | nd                                | nd                              | 27.86 ± 1.32                      | 6.15 ± 0.44                   | 3.47 ± 0.58                  | 18.15 ± 0.10                      | nd                                | nd                                | nd                              |
| Total <sup>d</sup>                                | 219.42 ± 38.59 <sup>i</sup>     | 49.43 ± 2.86 <sup>b,c,d,e,f</sup> | 28.72 ± 2.88 <sup>a,b,c,d</sup> | 77.80 ± 0.13 <sup>f,g</sup>       | 20.43 ± 1.01 <sup>a,b,c</sup> | 13.29 ± 0.14 <sup>a,b</sup>  | 51.22 ± 3.59 <sup>b,c,d,e,f</sup> | 33.08 ± 6.43 <sup>a,b,c,d,e</sup> | 57.98 ± 6.81 <sup>c,d,e,f</sup>   | 24.89 ± 2.53 <sup>a,b,c,d</sup> |
| Benzoic acids (µg GAE/g DW)                       |                                 |                                   |                                 |                                   |                               |                              |                                   |                                   |                                   |                                 |
| HE of protocatechuic acid                         | 11.51 ± 0.22                    | 0.19 ± 0.02                       | tr                              | nd                                | nd                            | nd                           | 8.08 ± 0.03                       | 5.05 ± 0.35                       | 7.07 ± 0.73                       | 11.34 ± 1.47                    |
| protocatechuic acid                               | nd                              | nd                                | nd                              | nd                                | nd                            | nd                           | nd                                | nd                                | nd                                | nd                              |
| p-Hydroxybenzoic acid                             | nd                              | nd                                | nd                              | nd                                | nd                            | nd                           | nd                                | nd                                | nd                                | nd                              |
| Ethyl gallate                                     | nd                              | 3.78 ± 1.20                       | nd                              | nd                                | nd                            | 6.08 ± 0.01                  | nd                                | 4.57 ± 2.16                       | nd                                | nd                              |
| HE of vanillic acid                               | 4.39 ± 0.57                     | 10.28 ± 2.19                      | 0.58 ± 0.33                     | 12.73 ± 0.14                      | 3.43 ± 0.92                   | tr                           | 6.30 ± 0.10                       | 4.80 ± 2.54                       | 6.96 ± 0.18                       | 9.75 ± 2.08                     |
| Total <sup>d</sup>                                | 15.90 ± 0.35 <sup>g,h,i,j</sup> | 14.25 ± 3.41 <sup>e,f,g,h,i</sup> | 0.58 ± 0.33 <sup>a</sup>        | 12.73 ± 0.14 <sup>c,d,e,f,g</sup> | 3.43 ± 0.92 <sup>a,b</sup>    | 6.08 ± 0.01 <sup>a,b,c</sup> | 14.39 ± 0.13 <sup>e,f,g,h,i</sup> | 14.42 ± 4.35 <sup>e,f,g,h,i</sup> | 14.03 ± 0.91 <sup>d,e,f,g,h</sup> | 21.09 ± 3.56 <sup>i,j,k,l</sup> |
| Ellagic acids (µg EAE/g DW)                       |                                 |                                   |                                 |                                   |                               |                              |                                   |                                   |                                   |                                 |
| Ellagic acid-rha                                  | nd                              | nd                                | nd                              | nd                                | nd                            | nd                           | nd                                | nd                                | 32.97 ± 9.04                      | nd                              |
| HHDP-galloylglucose                               | nd                              | nd                                | nd                              | nd                                | nd                            | nd                           | nd                                | nd                                | 95.42 ± 3.21                      | 184.91 ± 16.89                  |
| HHDP-glucose                                      | nd                              | nd                                | nd                              | nd                                | nd                            | nd                           | nd                                | nd                                | nd                                | 10.82 ± 1.47                    |
| Ellagitannin 1                                    | nd                              | nd                                | nd                              | nd                                | nd                            | nd                           | nd                                | nd                                | 93.45 ± 33.69                     | 92.37 ± 35.32                   |
| Ellagitannin 2                                    | nd                              | nd                                | nd                              | nd                                | nd                            | nd                           | nd                                | nd                                | 303.32 ± 86.53                    | 359.59 ± 98.08                  |
| Total <sup>d</sup>                                | nd                              | nd                                | nd                              | nd                                | nd                            | nd                           | nd                                | nd                                | 525.16 ± 123.42 <sup>a</sup>      | 647.68 ± 148.81 <sup>b</sup>    |
| Stilbenes (µg RE/g DW)                            |                                 |                                   |                                 |                                   |                               |                              |                                   |                                   |                                   |                                 |
| trans-Piceid                                      | nd                              | nd                                | nd                              | nd                                | nd                            | nd                           | nd                                | nd                                | tr                                | 56.41 ± 8.18                    |
| trans-Resveratrol                                 | tr                              | nd                                | nd                              | nd                                | nd                            | tr                           | tr                                | nd                                | 12.15 ± 4.17                      | 15.26 ± 4.33                    |
| Total <sup>b</sup>                                | nd                              | tr                                | nd                              | nd                                | nd                            | tr                           | tr                                | nd                                | 12.15 ± 4.17 <sup>a,b</sup>       | 71.67 ± 12.51 <sup>d</sup>      |

nd means not detected. tr means trace. Q, quercetin; K, kaempferol; Ir, isorhamnetin; L, laricitrin; S, syringetin; Dq, dihydroquercetin; Dk, dihydrokaempferol; gal, galactoside; gc, glucuronide; rha, rhamnoside; cagl, (6-caffeoyl)-glucoside; hex, hexoside; xyl, xyloside; rut, rutinoside. HE, hexose ester; rha, rhamnoside; <sup>a</sup> Numbers of each phenolic group represents non-anthocyanin phenolic compounds, see appendix 4; <sup>b</sup> Values are means of duplicate determination ± S.D.; <sup>c</sup> Each abbreviation represents a cultivar, see Table 1; <sup>d</sup> Different letters in each column are significantly different at 0.05 level from ANOVA.
